# Supplementary material for: Real-World Effectiveness of the Varicella Vaccine among Children and Adolescents in Qatar: A Case–Control Study
Source: MDPI journal article supplement (doi:10.3390/vaccines11101567), 2023-10-05

# Real-World Effectiveness of the Varicella Vaccine among Children and Adolescents in Qatar: A Case–Control Study

Zahra Bibi 1,†, Ahmed Daniyal Nawaz 1,†, Maha Al Kurbi 1, Shahad Fakhroo 1, Khaled Ferih 1, Noor Aljaber 1, Merin Alex 2, Khalid H. Elawad 2, Tawanda Chivese 1 and Susu M. Zughaier 1,\*

## Supplementary material file

**Supplementary Table S1: Cases distribution in PHCC**

| Health center   | 2017 | 2018 | 2019 | Total Freq(%) | 1-18 Years old PHCC visited patients in 2017-2019 | Chicken Pox cases per PHCC visited patients (%) |
|-----------------|------|------|------|---------------|---------------------------------------------------|-------------------------------------------------|
| ABN Abu Nakhla  | 2    | 14   | 19   | 35 (4.1)      | 16359                                             | 0.21                                            |
| ABS Abu Baker   | 0    | 34   | 41   | 75 (8.7)      | 25775                                             | 0.29                                            |
| ARP Airport     | 0    | 10   | 3    | 13 (1.5)      | 19202                                             | 0.07                                            |
| DYN Al Daayen   | 0    | 4    | 3    | 7 (0.8)       | 12440                                             | 0.06                                            |
| GHR Gharrafat   | 10   | 43   | 26   | 79 (9.2)      | 29355                                             | 0.27                                            |
| GHW Leghwairiya | 0    | 1    | 0    | 1 (0.1)       | 554                                               | 0.18                                            |
| JUM Jumailiya   | 0    | 0    | 1    | 1 (0.1)       | 683                                               | 0.15                                            |
| KHR Al Khor     | 6    | 18   | 2    | 26 (3.0)      | 12015                                             | 0.22                                            |
| LBB Leabaib     | 0    | 27   | 39   | 66 (7.7)      | 21960                                             | 0.30                                            |
| MES Mesaimeer   | 0    | 22   | 36   | 58 (6.7)      | 41747                                             | 0.14                                            |
| MKH M-Khalifa   | 0    | 24   | 12   | 36 (4.2)      | 18823                                             | 0.19                                            |
| MUA Muaither    | 0    | 19   | 39   | 58 (6.7)      | 18033                                             | 0.32                                            |
| OBK Al Khatab   | 17   | 18   | 23   | 58 (6.7)      | 12798                                             | 0.45                                            |
| QUN Qatar Univ  | 0    | 0    | 6    | 6 (0.7)       | 5342                                              | 0.11                                            |
| RAK Rawdat      | 0    | 19   | 31   | 50 (5.8)      | 30833                                             | 0.16                                            |
| RUW Al Ruwais   | 0    | 1    | 2    | 3 (0.3)       | 2408                                              | 0.12                                            |
| RYN Al Rayyan   | 0    | 13   | 13   | 26 (3.0)      | 23474                                             | 0.11                                            |
| SHN Sheehaniya  | 24   | 23   | 20   | 67 (7.8)      | 8510                                              | 0.79                                            |
| THM Al Thumama  | 0    | 13   | 19   | 32 (3.7)      | 19156                                             | 0.17                                            |
| UMG Um Ghalina  | 0    | 7    | 10   | 17 (2.0)      | 13197                                             | 0.13                                            |
| UMS Umm Slal    | 0    | 23   | 16   | 39 (4.5)      | 17973                                             | 0.22                                            |

|               |    |     |     |          |        |      |
|---------------|----|-----|-----|----------|--------|------|
| WAB Al Waab   | 0  | 3   | 10  | 13 (1.5) | 9433   | 0.14 |
| WAJ AL Wajbah | 0  | 9   | 18  | 27 (3.1) | 11878  | 0.23 |
| WAK Al Wakra  | 0  | 21  | 12  | 33 (3.8) | 34765  | 0.09 |
| WBC West Bay  | 4  | 17  | 15  | 36 (4.2) | 14727  | 0.24 |
| Total         | 63 | 383 | 416 | 862      | 423156 | 0.20 |

**Table S2**

**Supplementary Table S2: Nationalities of the cases according to the geographical regions.**

| Region/ nationality             | Freq. (n) | Percent (%) |
|---------------------------------|-----------|-------------|
| <b>Asia</b>                     |           |             |
| Bangladeshi                     | 10        | 1.16        |
| Filipino                        | 13        | 1.51        |
| Indian                          | 78        | 9.05        |
| Pakistani                       | 58        | 6.73        |
| Sri Lankan                      | 2         | 0.23        |
| <b>Middle East &amp; Africa</b> |           |             |
| Bahraini                        | 2         | 0.23        |
| Egyptian                        | 86        | 9.98        |
| Iranian                         | 11        | 1.28        |
| Iraqi                           | 2         | 0.23        |
| Palestinian                     | 23        | 2.67        |
| Jordanian                       | 29        | 3.36        |
| Lebanese                        | 5         | 0.58        |
| Omani                           | 6         | 0.70        |
| Qatari                          | 408       | 47.33       |
| Saudi                           | 14        | 1.62        |
| Syrian                          | 27        | 3.13        |
| Yemeni                          | 35        | 4.06        |
| <b>Africa</b>                   |           |             |

|                 |     |      |
|-----------------|-----|------|
| Algerian        | 2   | 0.23 |
| Eritrean        | 1   | 0.12 |
| Ethiopian       | 2   | 0.23 |
| Moroccan        | 1   | 0.12 |
| Nigerian        | 3   | 0.35 |
| Somali          | 2   | 0.23 |
| Sudanese        | 18  | 2.09 |
| Tunisian        | 7   | 0.81 |
| <b>Europe</b>   |     |      |
| British         | 6   | 0.70 |
| <b>Americas</b> |     |      |
| American        | 9   | 1.04 |
| Canadian        | 2   | 0.23 |
| <b>Total</b>    | 862 | 100  |

#### Supplementary Figure S1

Qatar Immunization services: link: <https://www.moph.gov.qa/english/OurServices/eservices/Pages/Baby-Immunization%E2%80%8B%E2%80%8B.aspx>

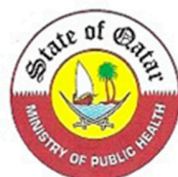

## IMMUNIZATION SCHEDULE IN THE STATE OF QATAR 2019

| AGE                   | BIRTH       | 2 MONTHS | 4 MONTHS | 6 MONTHS  | 12 MONTHS                                    | 18 MONTHS | 2 YEARS       | 4-6 YEARS   | 13-18 YEARS |
|-----------------------|-------------|----------|----------|-----------|----------------------------------------------|-----------|---------------|-------------|-------------|
| VACCINE               |             |          |          |           |                                              |           |               |             |             |
| BCG                   | BCG         |          |          |           |                                              |           |               |             |             |
| HEPATITIS B           | Hepatitis B |          |          |           |                                              |           |               |             |             |
| PENTA                 |             |          |          | Penta     |                                              |           |               |             |             |
| HEXA                  |             | Hexa 1   | Hexa 2   |           |                                              |           |               |             |             |
| TETRA                 |             |          |          |           |                                              | Tetra *   |               |             |             |
| DTaP                  |             |          |          |           |                                              |           |               | DTaP B**    |             |
| Tdap                  |             |          |          |           |                                              |           |               |             | Tdap        |
| ROTAVIRUS             |             | Rota 1   | Rota 2   |           |                                              |           |               |             |             |
| OPV                   |             |          |          | OPV 1     |                                              | OPV 2     |               | OPV 3       |             |
| PCV 13                |             | PCV 1    | PCV 2    | PCV 3     |                                              |           |               |             |             |
| MMR                   |             |          |          |           | MMR 1                                        | MMR 2     |               |             |             |
| VARICELLA             |             |          |          |           | Varicella 1                                  |           |               | Varicella 2 |             |
| HEPATITIS A           |             |          |          |           | Hepatitis A (2 doses with 6 months interval) |           |               |             |             |
| MENINGOCOCCAL ACYW135 |             |          |          |           |                                              |           | Meningococcal |             |             |
| INFLUENZA             |             |          |          | Influenza |                                              |           |               |             |             |

■ Routinely recommended vaccines.

■ Influenza vaccine recommended annually from 6 months and above during flu season especially for high risk persons.

■ Meningococcal vaccine is recommended for children at 2 years of age, high risk persons and travelers to endemic areas

■ Two doses of Hepatitis A vaccine is recommended for children and adolescents with frequent travel to high risk countries.

1. **MMR:** Measles, Mumps, Rubella

2. **HEXA:** Hepatitis B, DTaP, Hib, IPV

3. **PENTA:** Hepatitis B, DTP, Hib

4. **TETRA:** DTaP, Hib

\* DTaP alone or Pentaxim or any vaccine containing DTaP may be used at 18 months if Tetra is not available. DTaP/DTP/DT vaccine should not be used above 6 years of age. Use Tdap/Td instead.

\*\* Tdap (Boostrix brand) can be used if DTaP is not available.

For more information, please call  
Hotline: 66740948 - 66740951

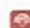

www.moph.gov.qa

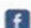

/MOPHqatar

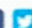

MOPHqatar

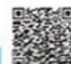

Supplement: s1 [file s1]
